# Supplementary material
Source: ML conference proceedings conference paper supplement (https://aclanthology.org/2026.semeval-1.147)

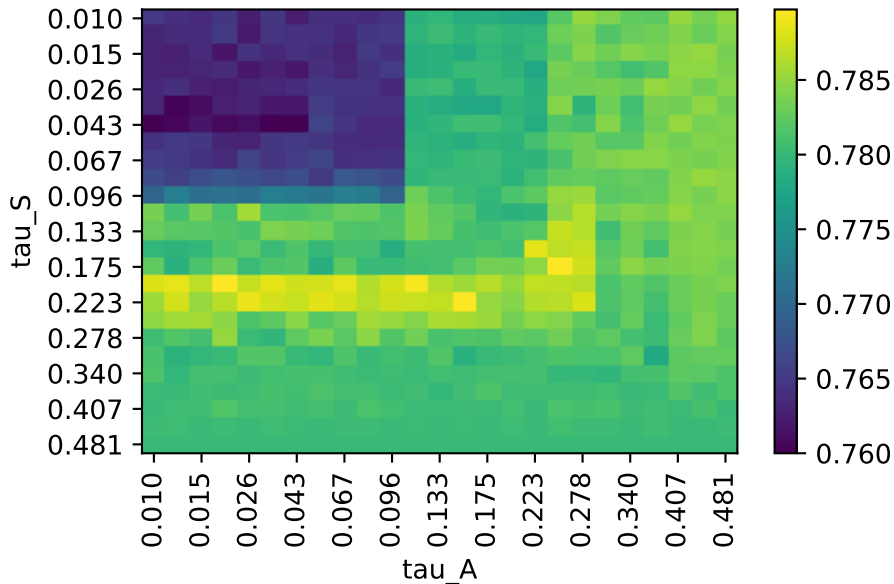

Supplement: SupplementaryMaterial [file tau_heatmap.pdf › tau_heatmap.pdf]
